# Supplementary material
Source: PubMed Central journal article supplement (PMC1334633)

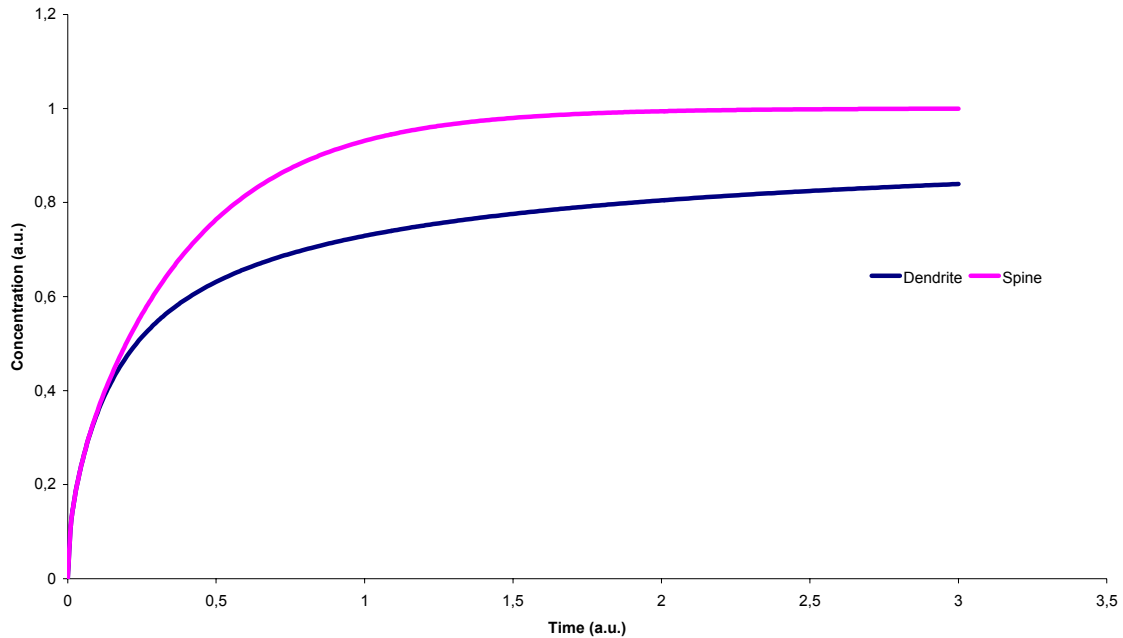

Supplement: pnas_0505557103_1.pdf [file pnas_0505557103_1.pdf]
